# Supplementary material for: Effects of the surface charge on the stability of PEG-b-PCL micelles: simulation of the interactions between charged micelles and plasma components
Source: Royal Society of Chemistry journal article supplement (doi:10.1039/c3py01281f), 2013-10-18
Supplement: c3py01281f.pdf [file c3py01281f.pdf]

## Supporting Information

### **Effects of surface charge on the stability of PEG-b-PCL micelles: simulate the interactions between charged micelles and plasma components**

**Yaoming Wan,<sup>a</sup> Zhihua Gan<sup>\*b</sup> and Zhibo Li<sup>\*a</sup>**

<sup>a</sup> *Beijing National Laboratory for Molecular Sciences (BNLMS), Institute of Chemistry, Chinese Academy of Science, Beijing 100190, China;*

<sup>b</sup> *State Key Laboratory of Organic-inorganic Composites, College of Life Science and Technology, Beijing University of Chemical Technology, Beijing 100029, China.*

\* To whom correspondence should be addressed.

<sup>a</sup> Beijing National Laboratory for Molecular Sciences (BNLMS), Institute of Chemistry, Chinese Academy of Sciences, Beijing 100190, China. Tel: (+) 8610 6256 5612; zbli@iccas.ac.cn;

<sup>b</sup> State Key Laboratory of Organic-inorganic Composites, College of Life Science and Technology, Beijing University of Chemical Technology, Beijing 100029, China.  
Tel: (+) 8610 6443 2762; zhgan@mail.buct.edu.cn.

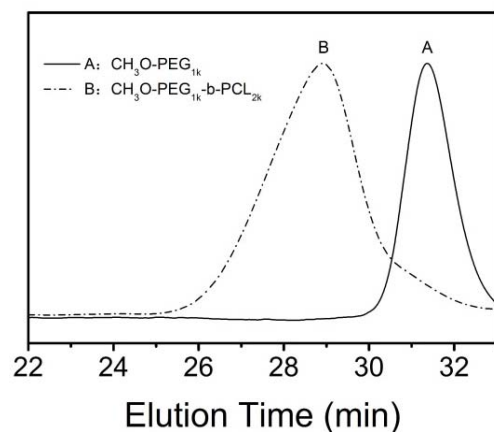

**Fig. S1** GPC traces of CH<sub>3</sub>O-PEG-OH (A: M<sub>w</sub>=1000, PDI=1.05), CH<sub>3</sub>O -PEG-b-PCL (B: M<sub>w</sub>=3100, PDI=1.15) in DMF

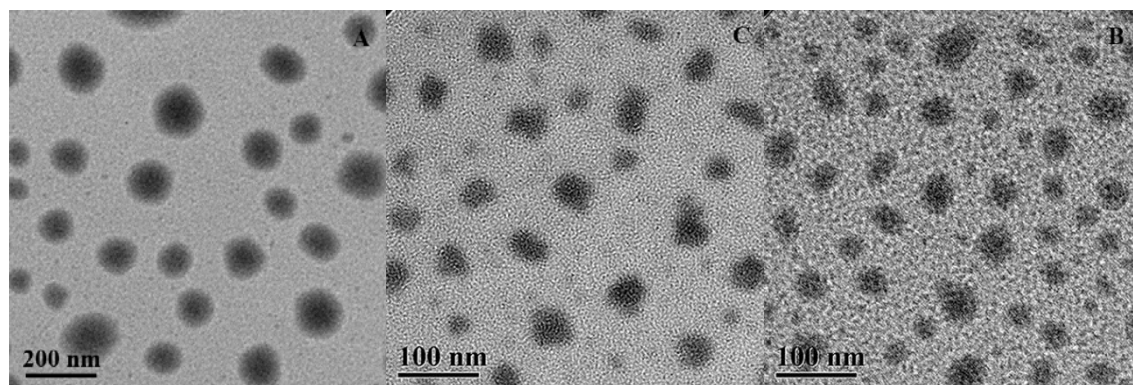

**Fig. S2** TEM images of CH<sub>3</sub>O micelles (A), NH<sub>2</sub> /COOH(1:1) mixed micelles (B) and COOH micelles(C)

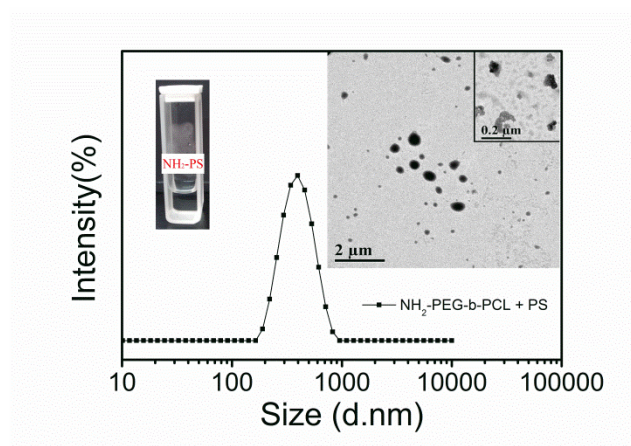

**Fig. S3** DLS and TEM result of NH<sub>2</sub>-PEG-PCL micelles after degradation at 25 °C (pH 7.0)

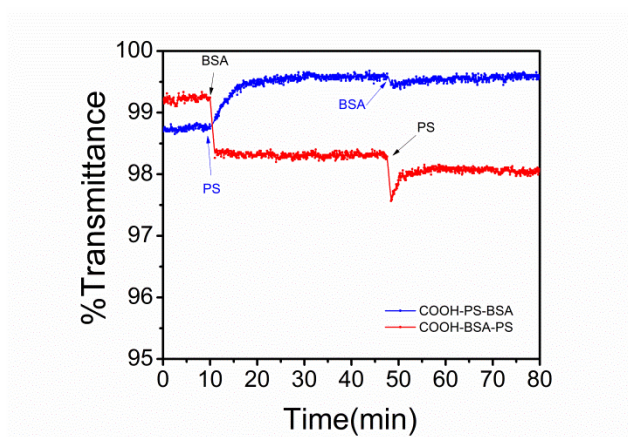

**Fig. S4** Time dependence of UV transparency at 500 nm recorded for 1 mg/mL aqueous solution of COOH micelles prepared by COOH-PEG-b-PCL diblock copolymer upon treating with 1 mg/mL lipase PS and 1mg/mL BSA at 25 °C (pH 7.0)

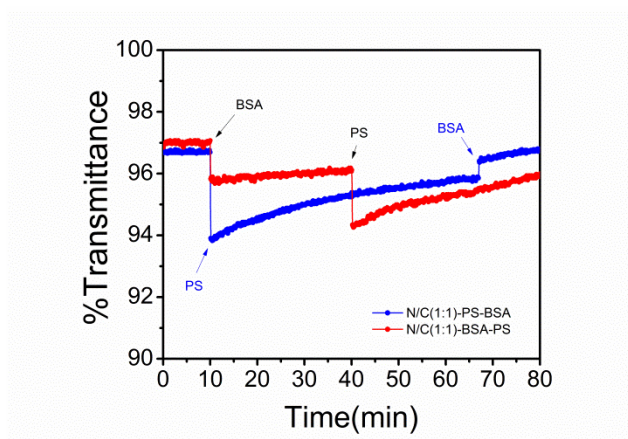

**Fig. S5** Time dependence of UV transparency at 500 nm recorded for 1 mg/mL aqueous solution of NH<sub>2</sub>/COOH (1:1) micelles prepared by NH<sub>2</sub>-PEG-b-PCL and COOH-PEG-b-PCL diblock copolymers upon treating with 1mg/mL lipase PS and 1mg/mL BSA at 25 °C (pH 7.0)

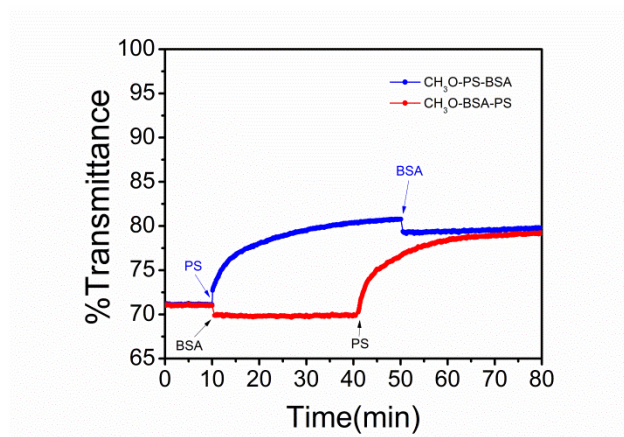

**Fig. S6** Time dependence of UV transparency at 500 nm recorded for 1 mg/mL aqueous solution of CH<sub>3</sub>O micelles prepared by CH<sub>3</sub>O -PEG-b-PCL diblock copolymer upon treating with 1 mg/mL lipase PS and 1mg/mL BSA at 25 °C (pH 7.0)
